# Supplementary material for: Protein-truncating variants in BSN are associated with severe adult-onset obesity, type 2 diabetes and fatty liver disease
Source: bioRxiv or medRxiv preprint supplement (doi:10.1101/2023.06.14.23291368), 2023-06-16
Supplement: Supplementary file [file media-2.pdf]

1 **Supplementary Figures**

2

3 **Figure S1 | Exome-wide rare (MAF <0.1%) variant associations with BMI.** (a) Combined  
4 Manhattan plot showing gene burden test results. Genes passing exome-wide significance  
5 ( $P < 1.33 \times 10^{-6}$ ) are highlighted. Points are annotated with variant predicted functional class  
6 (MISS REVEL; missense variants with REVEL scores (above 0.5 or 0.7), HC PTV; high  
7 confidence protein truncating variants). (b) Combined QQ plot for the gene burden tests.

8

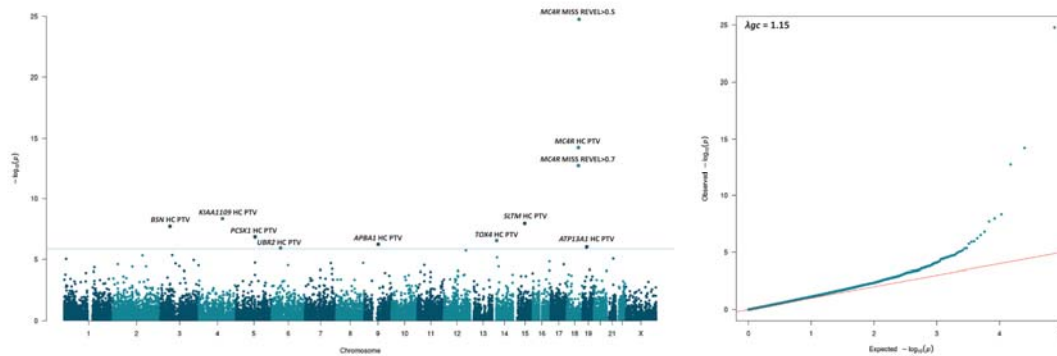

9  
10  
11

12 **Figure S2 | Synonymous variant associations with BMI.** Comparison of the QQ plots for  
13 gene burden associations for the three discovery variant mask and the synonymous variant  
14 mask.

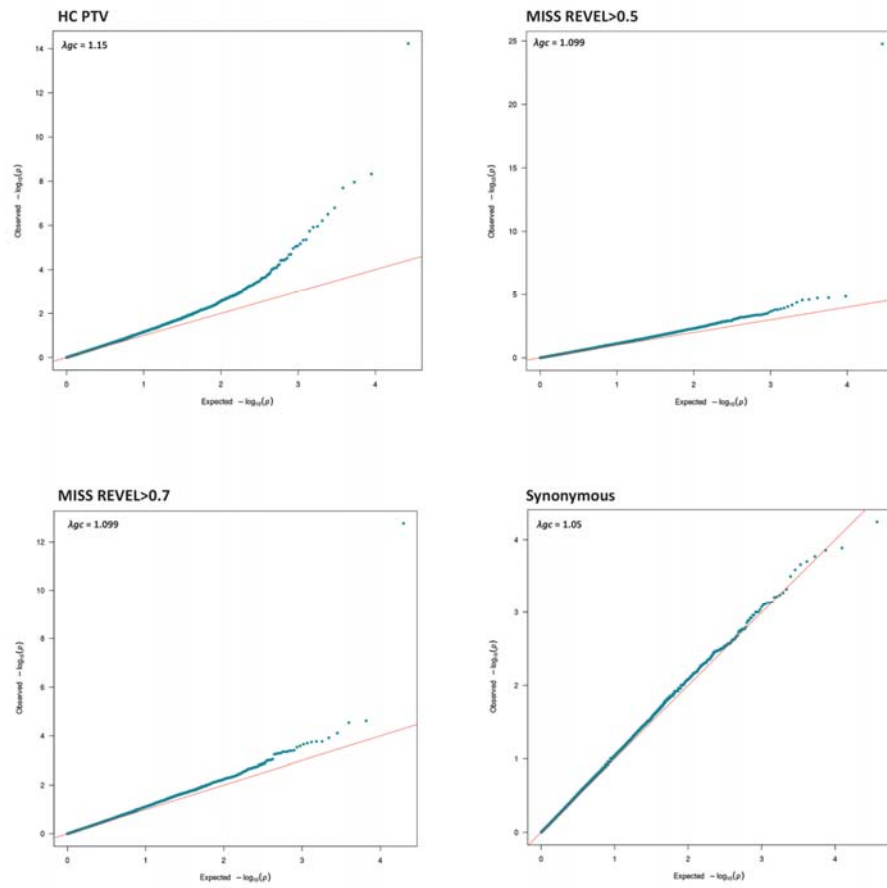

15  
16  
17

18 **Figure S3 | GWAS loci proximal to the exome-wide significant genes.** Associations in the  
 19 UK Biobank BMI GWAS surrounding ( $\pm 500\text{kb}$ ) the 2 genes identified by exome-wide  
 20 association with BMI, *BSN* (a) and *ATP13A1* (b). Relevant data are included in Table S2.

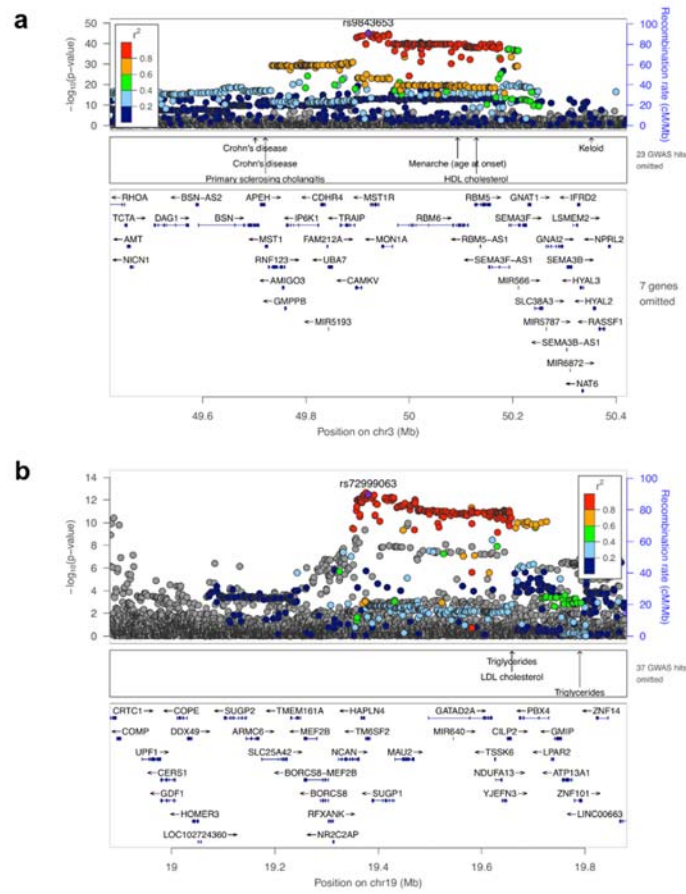

21

22

23 **Figure S4 | Replication of GWAS signals in Locke et al.<sup>1</sup>** Associations from the UK  
 24 Biobank BMI GWAS at the *BSN* (a) and *ATP13A1* (b) loci, were further queried in an  
 25 independent GWAS cohort. Relevant data are included in Table S2.

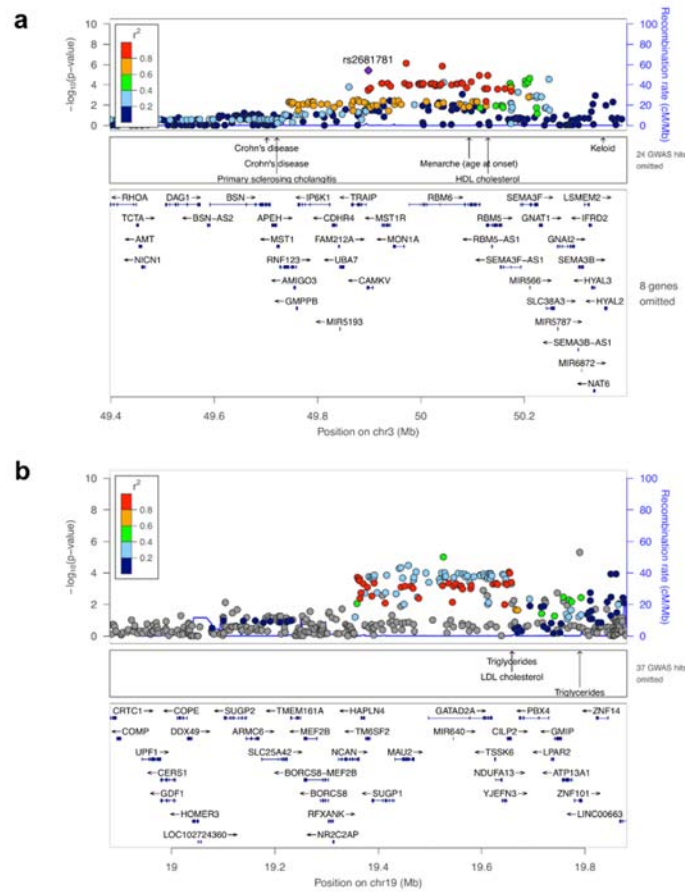

26  
 27  
 28

29 **Figure S5 | Geographical distribution of *APBA1* and *BSN* HC PTV carriers.**

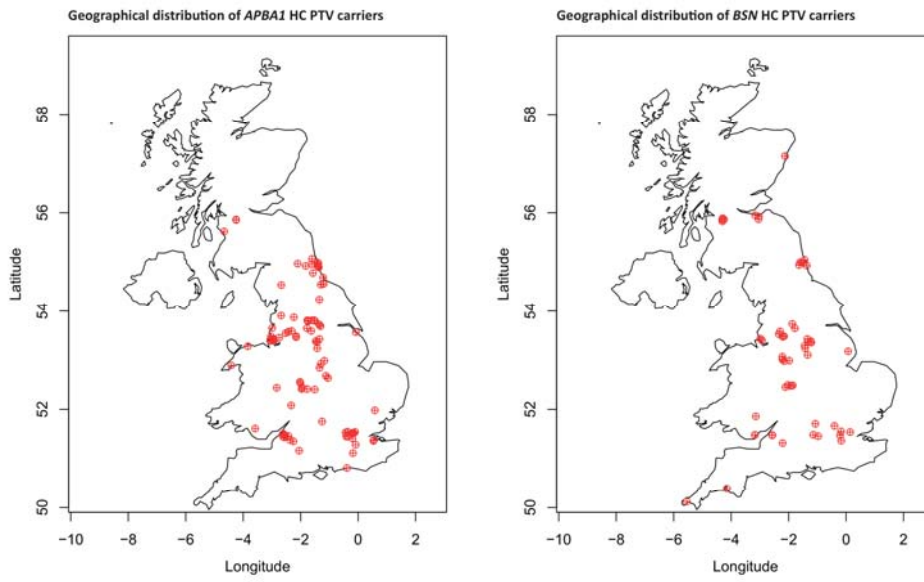

30  
31  
32

33 **Figure S6 | Interaction effect between PGS and *BSN* HC PTV carrier status.** Evidence of  
34 an interaction effect between PGS and carrier status of *BSN* HC PTV (beta=0.31, 95% CI:  
35 0.12-0.60; p=0.01) such that the combined effect of one unit increase in PRS and being a  
36 carrier is greater than the sum of their marginal effect by 0.3 standard deviation in BMI.

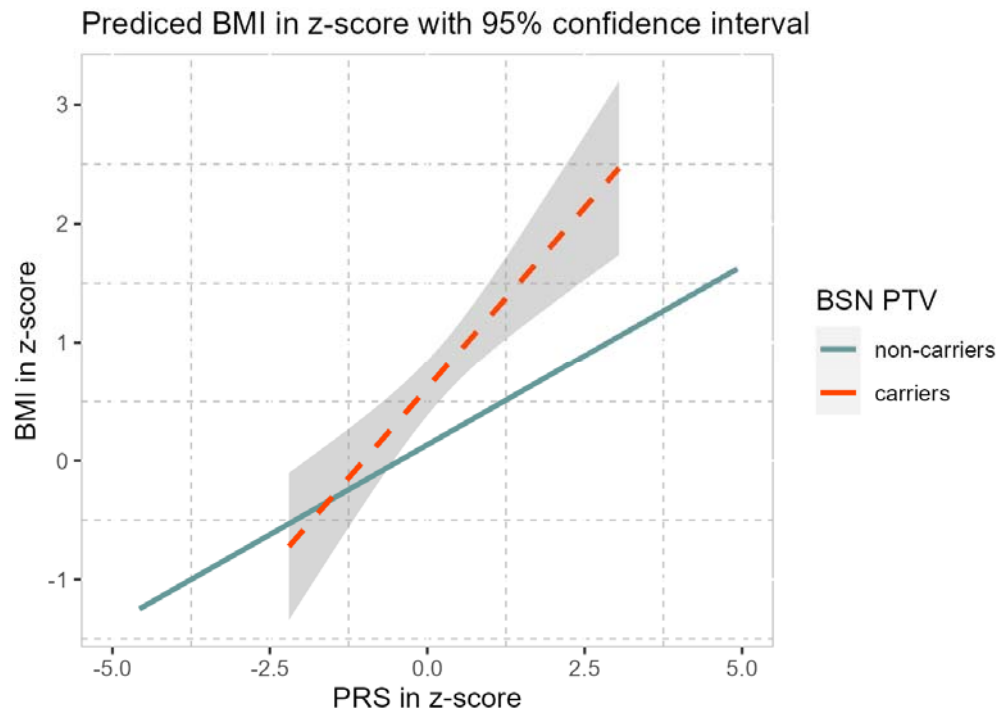

37  
38  
39

40 **Figure S7 | Kolf2 iPSCs differentiation into hypothalamic neurons.** Kolf2 iPSCs are  
41 shown here on day 36 of differentiation. The top panel shows the WT and bottom panel –  
42 *BSN* Het P399X.

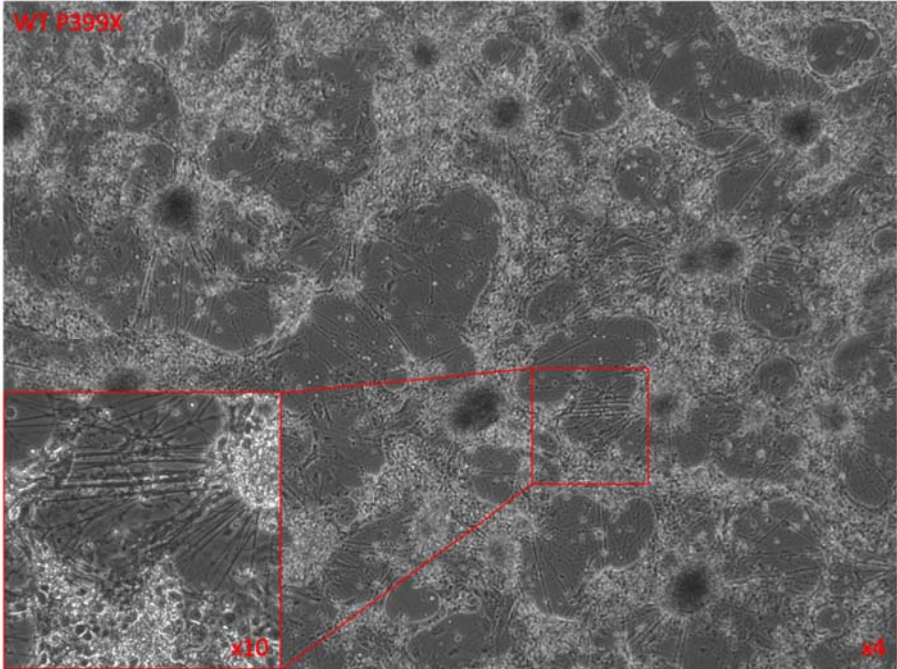

43

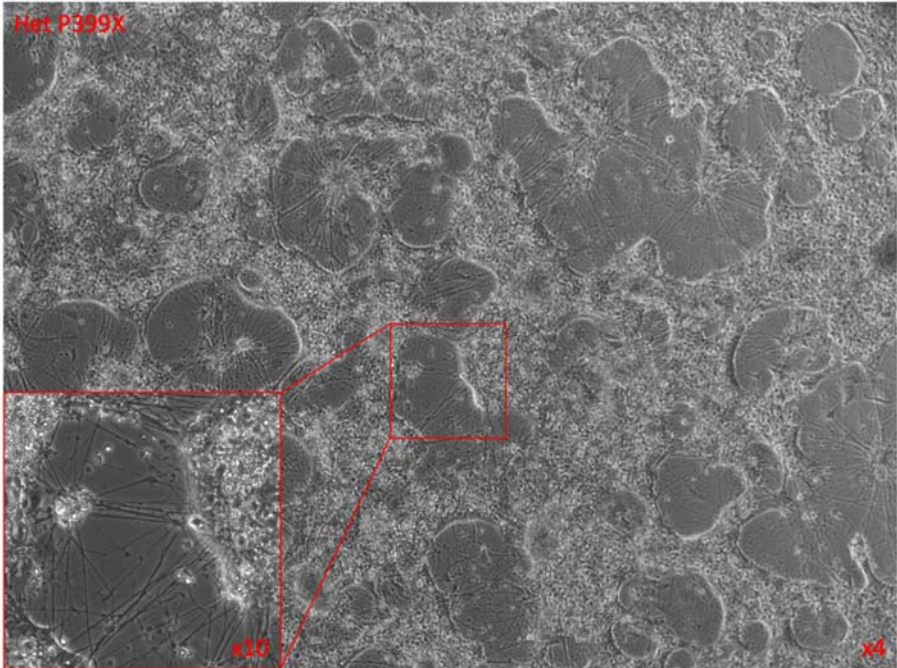

44

45

46



47 **Figure S8 | UMAP plots showing normalized expression of *RBFOX3*, *BSN* and *PCLO*.**  
48 Top row shows clustering of all the cells from single nucleus RNAseq. Bottom row shows re-  
49 reclustering of clusters 1 and 5 from the top row.

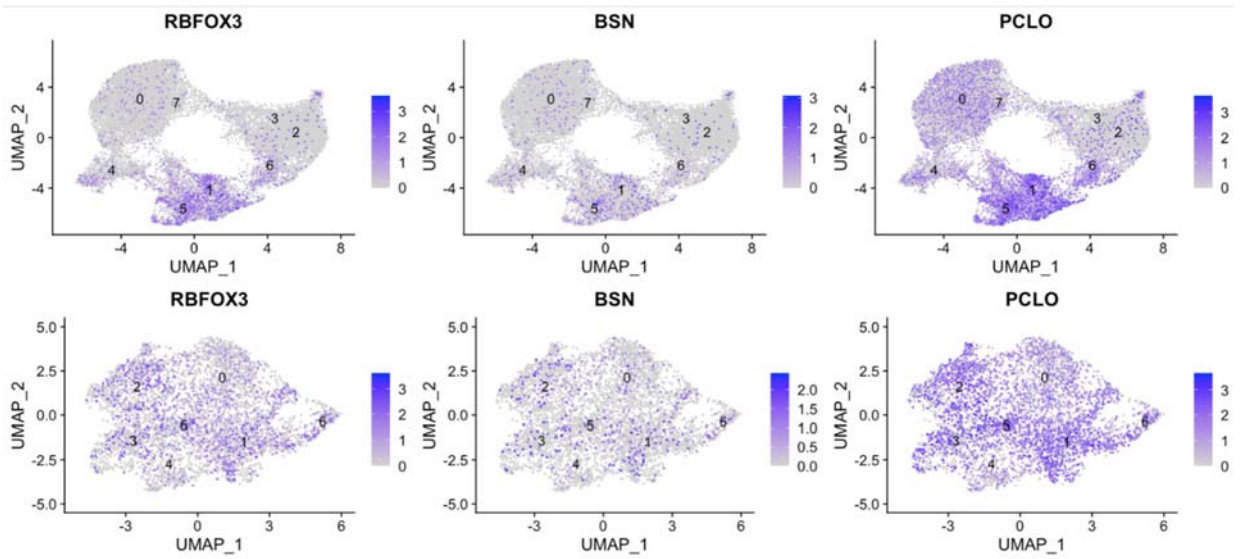

50

51

52



53 **References**

- 54 1. Locke, A. E. *et al.* Genetic studies of body mass index yield new insights for obesity  
55 biology. *Nature* 2015 518:7538 **518**, 197–206 (2015).

56
